# Supplementary material for: Anisotropic hydrogels with high-sensitivity and self-adhesion for wearable sensors
Source: Royal Society of Chemistry journal article supplement (doi:10.1039/d2tc03877c), 2022-11-22
Supplement: d2tc03877c1.pdf [file d2tc03877c1.pdf]

## Electronic Supplementary Information

### Anisotropic Hydrogel with High-sensitivity and Self-adhesion for Wearable Sensors

Wentang Wang <sup>a</sup>, Xinyue Deng <sup>a</sup>, Chunhui Luo <sup>a,b,c,\*</sup>

<sup>a</sup> College of Chemistry and Chemical Engineering, North Minzu University, Yinchuan, Ningxia 750021, China, \*Corresponding Author. E-mail address: luo@nun.edu.cn (C. Luo).

<sup>b</sup> Key Laboratory of Chemical Engineering and Technology, State Ethnic Affairs Commission, North Minzu University, Yinchuan 750021, Ningxia, China

<sup>c</sup> Ningxia Key Laboratory of Solar Chemical Conversion Technology, North Minzu University, Yinchuan 750021, China

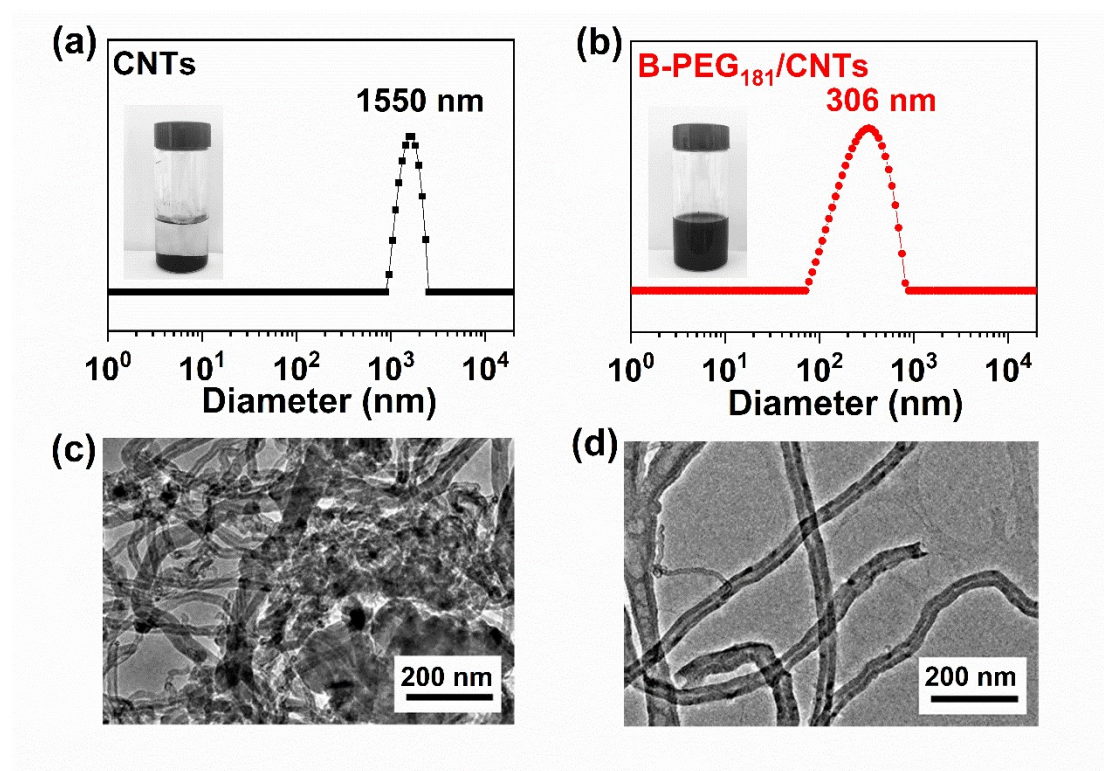

**Fig. S1** The diameter and distribution of CNTs solution without (a) and with (b) B-PEG<sub>181</sub>. TEM images of the CNTs solution before (c) and after adding (d) B-PEG<sub>181</sub>.

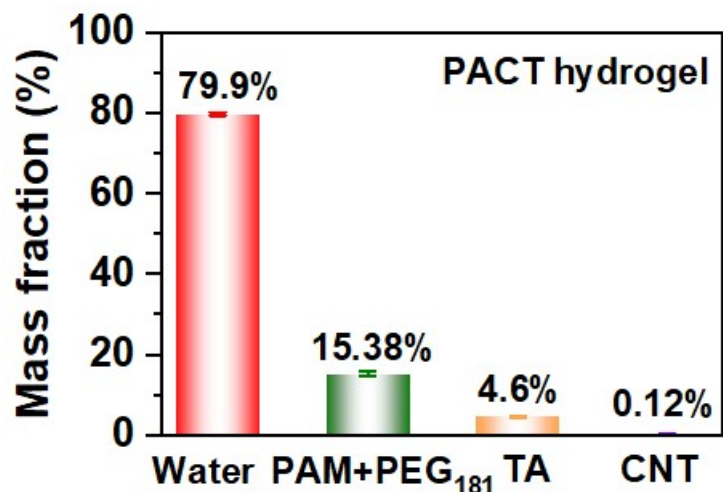

Fig. S2 Mass fraction of each component in the PACT hydrogel.

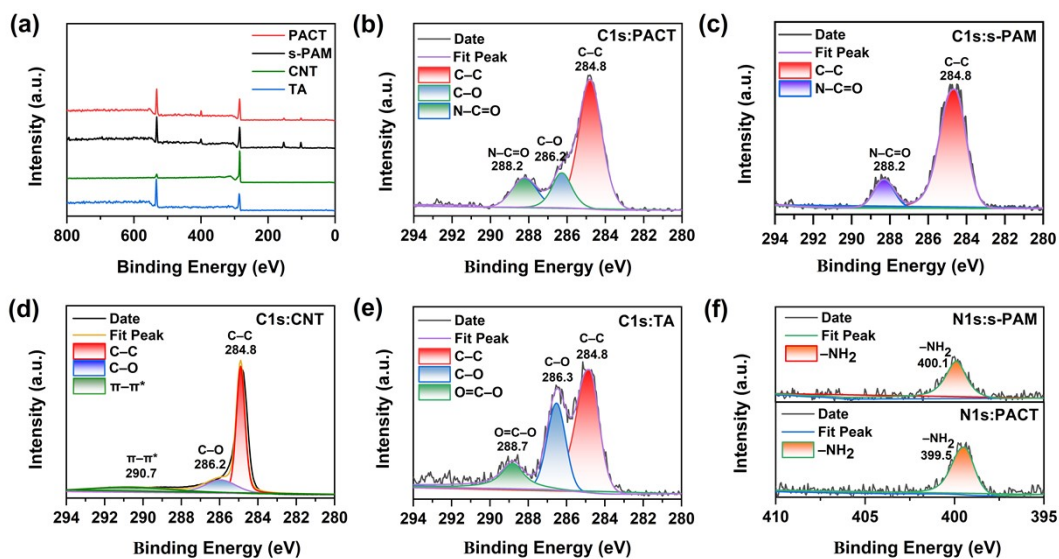

Fig. S3 XPS pattern of PACT hydrogels, s-PAM hydrogels, CNT and TA (a). C1s spectrum of PACT hydrogels (b), s-PAM hydrogels (c), CNT (d) and TA (e). N1s spectrum of s-PAM hydrogels and PACT hydrogels (f).

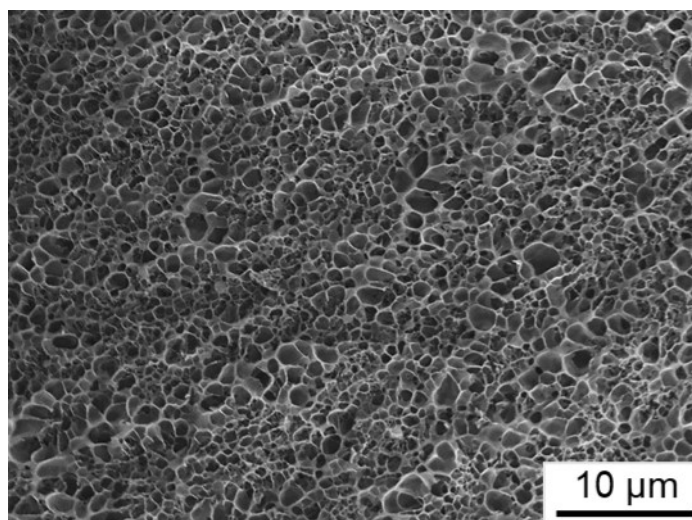

**Fig. S4** SEM image of the s-PAM hydrogel.

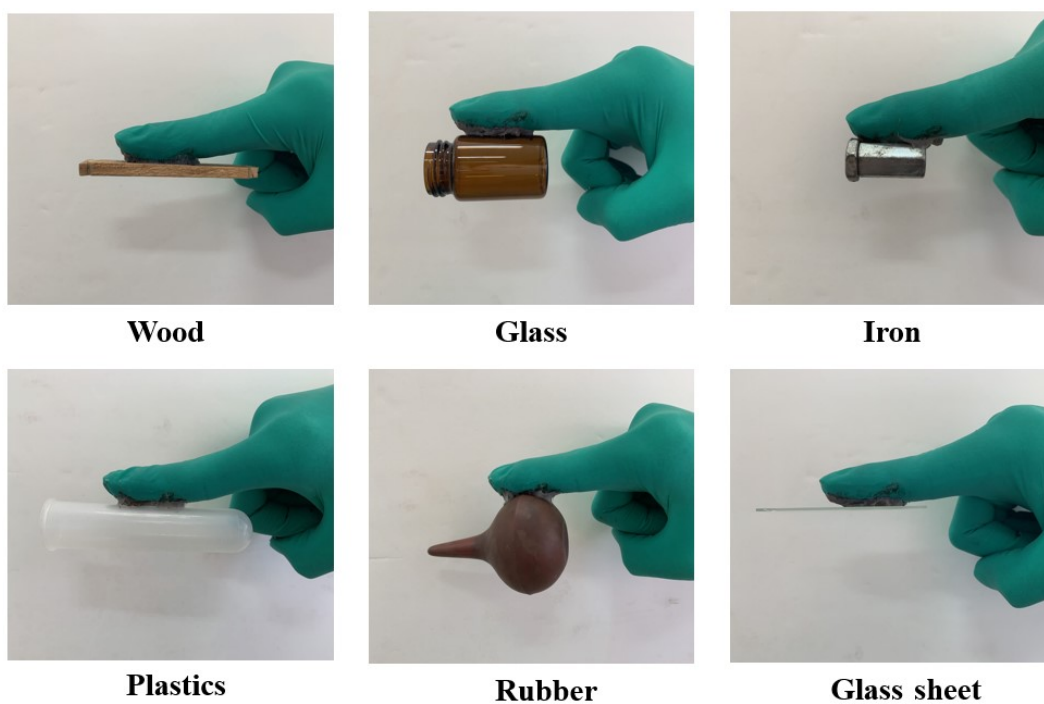

**Fig. S5** The PACT hydrogel can spontaneously adhere to a variety of substrates with different properties.

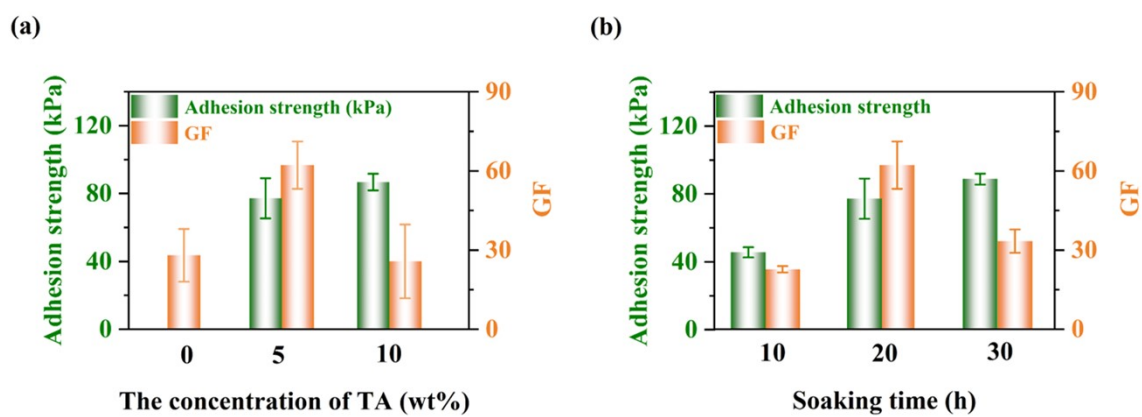

**Fig. S6** Adhesion strength and GF of hydrogels at different TA concentrations (a) and soaking times (b).

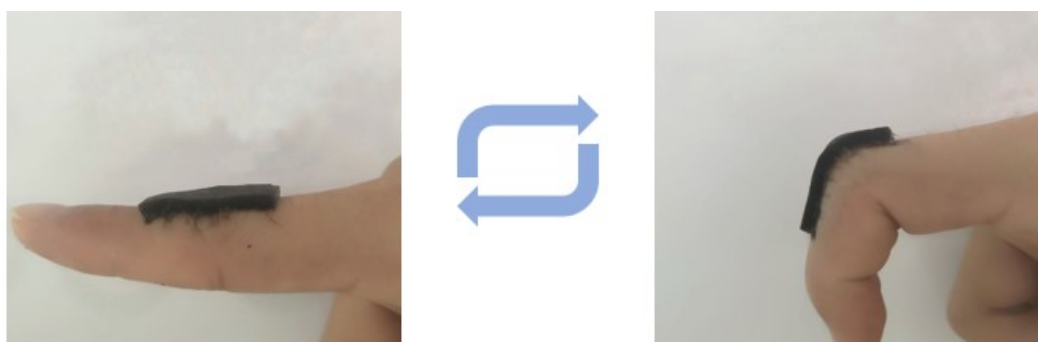

**Fig. S7** The finger was repeatedly bent more than 1000 times.

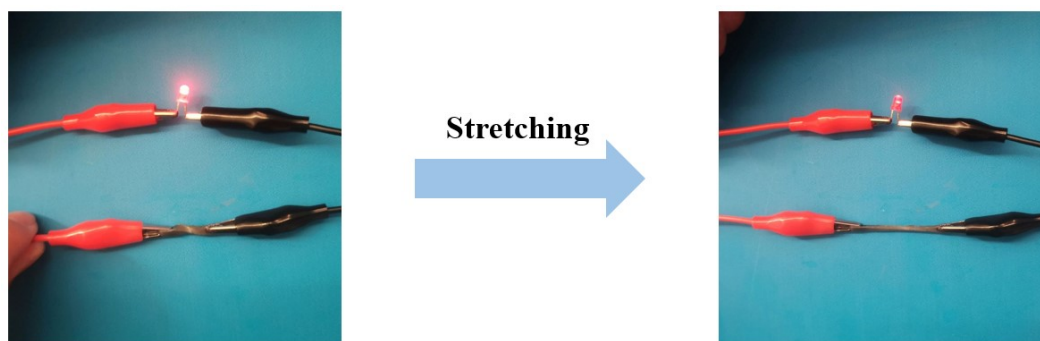

**Fig. S8** The LED became dim after stretching.

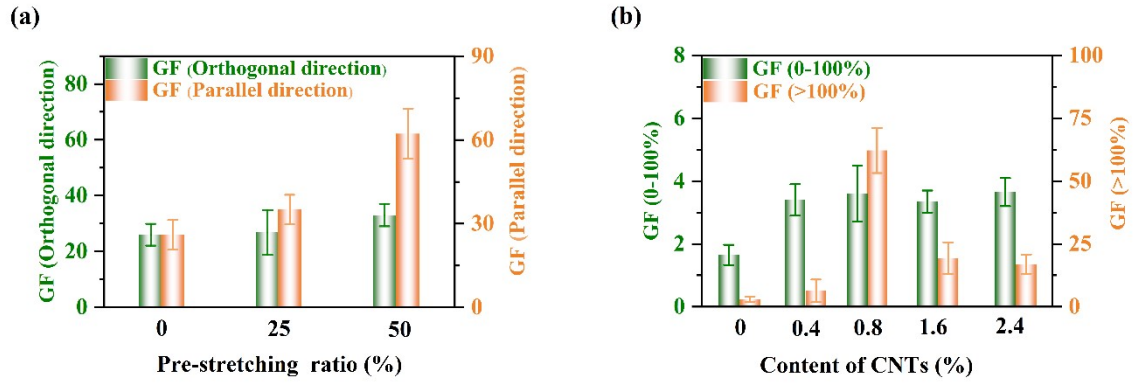

**Fig. S9** GF of PACT hydrogel in parallel and orthogonal directions for different stretching ratios (a), GF of PACT hydrogel with different CNT contents (b).

| Sample                            | GF (strain < 100%) | GF (strain > 100%) | Adhesion strength (kPa) | Reference        |
|-----------------------------------|--------------------|--------------------|-------------------------|------------------|
| <b>PACT-P</b>                     | <b>3.2</b>         | <b>62.2</b>        | <b>77.2</b>             | <b>This Work</b> |
| PAM/LiCl/CNT                      | 1.07               | 2.32               | N.A.                    | [1]              |
| HSAH/PHEAA                        | 2.49               | 10.47              | 28.5                    | [2]              |
| MXene/PVA/ZnSO <sub>4</sub>       | 4.77               | 5.82               | N.A.                    | [3]              |
| P (THAM/AM))/CNF/Fe <sup>3+</sup> | 2.40               | 3.69               | N.A.                    | [4]              |
| MASTA/PANI                        | 1.13               | 2.18               | N.A.                    | [5]              |
| PAA/CMC/Al <sup>3+</sup>          | 1.97               | 3.60               | N.A.                    | [6]              |
| PVA/PAM/NaCl                      | 4.178              | 24.901             | N.A.                    | [7]              |
| AAM/SDS/LMS/LiCl                  | 1.47               | 5.44               | N.A.                    | [8]              |
| PVA/Borax/CNT                     | 0.24               | 1.51               | N.A.                    | [9]              |
| AM/Eg/GI/KCl                      | 1.9                | 6.0                | N.A.                    | [10]             |
| Mxene/PVA                         | 2.0                | 25.0               | N.A.                    | [11]             |

**Table. S1** Comparison of existing gels in terms of GF and adhesion strength.

## References

- [1] M. Wu, J. Chen, Y. Ma, B. Yan, M. Pan, Q. Peng, W. Wang, L. Han, J. Liu and H. Zeng, Ultra Elastic, Stretchable, self-healing conductive hydrogels with tunable optical properties for highly sensitive soft electronic sensors, *J. Mater. Chem. A*, 2020, **8**, 24718-24733.
- [2] Y. Liang, K. Wang, J. Li, H. Wang, X. Q. Xie, Y. Cui, Y. Zhang, M. Wang and C. S. Liu, Low-molecular-weight supramolecular-polymer double network eutectogels for self-adhesive and bidirectional sensors, *Adv. Funct. Mater.*, 2021, **31**, 2104963.
- [3] Y. Feng, H. Liu, W. Zhu, L. Guan, X. Yang, A. V. Zvyagin, Y. Zhao, C. Shen, B. Yang and Q. Lin, Muscle-inspired MXene conductive hydrogels with anisotropy and low-temperature tolerance for wearable flexible sensors and arrays, *Adv. Funct. Mater.*, 2021, **31**, 2105264.
- [4] C. Shan, M. Che, A. Cholewinski, J. Ki Kunihiro, E. K. F. Yim, R. Su and B. Zhao, Adhesive hydrogels tailored with cellulose nanofibers and ferric ions for highly sensitive strain sensors, *Chem. Eng. J.*, 2022, **450**, 138256.
- [5] K. Hou, S. Zhao, D. Wang, P. Zhao, C. Li and J. Zuo, A Puncture-resistant and self-healing conductive gel for multifunctional electronic skin, *Adv. Funct. Mater.*, 2021, **31**, 2107006.
- [6] J. Liu, Z. Chen, Y. Chen, H. U. Rehman, Y. Guo, H. Li and H. Liu, Ionic Conductive organohydrogels with dynamic pattern behavior and multi-environmental stability, *Adv. Funct. Mater.*, 2021, **31**, 2101464.
- [7] G. Chen, J. Huang, J. Gu, S. Peng, X. Xiang, K. Chen, X. Yang, L. Guan, X. Jiang and L. Hou, Highly tough supramolecular double network hydrogel electrolytes for an artificial flexible and low-temperature tolerant sensor, *J. Mater. Chem. A*, 2020, **8**, 6776-6784.
- [8] S. Xia, Q. Zhang, S. Song, L. Duan and G. Gao, Bioinspired dynamic cross-linking hydrogel sensors with skin-like strain and pressure sensing behaviors, *Chem. Mater.*, 2019, **31**, 9522-9531.
- [9] G. Cai, J. Wang, K. Qian, J. Chen, S. Li and P. S. Lee, Extremely stretchable strain sensors based on conductive self-healing dynamic cross-links hydrogels for human-motion detection. *Adv Sci.*, 2017, **4**, 1600190.

[10] J. Wu, Z. Wu, X. Lu, S. Han, B. Yang, X. Gui, K. Tao, J. Miao and C. Liu, Ultrastretchable and stable strain sensors based on antifreezing and self-healing ionic organohydrogels for human motion monitoring, *ACS Appl. Mater. Interfaces*, 2019, **11**, 9405-9414.

[11] Y. Zhang, K. H. Lee, D. H. Anjum, R. Sougrat, Q. Jiang, H. Kim and H. N. Alshareef, MXenes stretch hydrogel sensor performance to new limits, *Sci. Adv.*, 2018, **4**, eaat0098.
